# Supplementary material for: What are the effects of implementing patient-controlled admissions in inpatient care? A study protocol of a large-scale implementation and naturalistic evaluation for adult and adolescent patients with severe psychiatric conditions throughout Region Stockholm
Source: PubMed Central journal article supplement (PMC9386218; doi:10.1136/bmjopen-2022-065770), 2022-08-16
Supplement: bmjopen-2022-065770.draft_revisions.pdf [file bmjopen-2022-065770.draft_revisions.pdf]

# BMJ Open

BMJ Open is committed to open peer review. As part of this commitment we make the peer review history of every article we publish publicly available.

When an article is published we post the peer reviewers' comments and the authors' responses online. We also post the versions of the paper that were used during peer review. These are the versions that the peer review comments apply to.

The versions of the paper that follow are the versions that were submitted during the peer review process. They are not the versions of record or the final published versions. They should not be cited or distributed as the published version of this manuscript.

BMJ Open is an open access journal and the full, final, typeset and author-corrected version of record of the manuscript is available on our site with no access controls, subscription charges or pay-per-view fees (<http://bmjopen.bmj.com>).

If you have any questions on BMJ Open's open peer review process please email [info.bmjopen@bmj.com](mailto:info.bmjopen@bmj.com)

# BMJ Open

## Patient-controlled admissions to inpatient care: A study protocol of a large-scale implementation and naturalistic evaluation for adult and adolescent patients with severe psychiatric conditions in Region Stockholm

|                               |                                                                                                                                                                                                                                                                                                                                                                                                                                                                                                                                                                                                                                                                                                                                                                                                                                                                                                         |
|-------------------------------|---------------------------------------------------------------------------------------------------------------------------------------------------------------------------------------------------------------------------------------------------------------------------------------------------------------------------------------------------------------------------------------------------------------------------------------------------------------------------------------------------------------------------------------------------------------------------------------------------------------------------------------------------------------------------------------------------------------------------------------------------------------------------------------------------------------------------------------------------------------------------------------------------------|
| Journal:                      | <i>BMJ Open</i>                                                                                                                                                                                                                                                                                                                                                                                                                                                                                                                                                                                                                                                                                                                                                                                                                                                                                         |
| Manuscript ID                 | bmjopen-2022-065770                                                                                                                                                                                                                                                                                                                                                                                                                                                                                                                                                                                                                                                                                                                                                                                                                                                                                     |
| Article Type:                 | Protocol                                                                                                                                                                                                                                                                                                                                                                                                                                                                                                                                                                                                                                                                                                                                                                                                                                                                                                |
| Date Submitted by the Author: | 16-Jun-2022                                                                                                                                                                                                                                                                                                                                                                                                                                                                                                                                                                                                                                                                                                                                                                                                                                                                                             |
| Complete List of Authors:     | Smitmanis Lyle, Maria; Stockholm Health Care Services, Department of Clinical Neuroscience<br>Allenius, Emelie; Stockholm Health Care Services, Department of Clinical Neuroscience<br>Salomonsson, Sigrid; Stockholm Health Care Services, Department of Clinical Neuroscience<br>Björkdahl, Anna; Stockholm Health Care Services, Department of Clinical Neuroscience<br>Strand, Mattias; Stockholm Health Care Services, Department of Clinical Neuroscience<br>Flykt, L; Karolinska Institutet<br>Hellner, Clara; Karolinska Institute, Clinical neuroscience<br>Lundgren, Tobias; Karolinska Institute, Clinical Neuro Science ;<br>Jayaram-Lindström, Nitya; Karolinska Institutet, Centre for Psychiatry Research, Department of Clinical Neuroscience<br>Rozental, Alexander; Stockholm Health Care Services, Department of Clinical Neuroscience; Uppsala University, Department of Psychology |
| Keywords:                     | Adult psychiatry < PSYCHIATRY, Child & adolescent psychiatry < PSYCHIATRY, PSYCHIATRY                                                                                                                                                                                                                                                                                                                                                                                                                                                                                                                                                                                                                                                                                                                                                                                                                   |
|                               |                                                                                                                                                                                                                                                                                                                                                                                                                                                                                                                                                                                                                                                                                                                                                                                                                                                                                                         |

SCHOLARONE™  
Manuscripts

1  
2  
3 **Patient-controlled admissions to inpatient care: A study protocol of a large-scale**  
4 **implementation and naturalistic evaluation for adult and adolescent patients with**  
5 **severe psychiatric conditions in Region Stockholm**  
6  
7  
8  
9

10 Maria Smitmanis Lyle<sup>1</sup>; Emelie Allenius<sup>1</sup>; Sigrid Salomonsson<sup>1</sup>; Anna Björkdahl<sup>1</sup>;  
11 Mattias Strand<sup>1</sup>; Lena Flyckt<sup>1</sup>; Clara Hellner<sup>1</sup>; Tobias Lundgren<sup>1</sup>; Nitya Jayaram-Lindström<sup>1</sup>;  
12 Alexander Rozental<sup>1,2\*</sup>  
13  
14  
15  
16

17 1 Centre for Psychiatry Research, Department of Clinical Neuroscience, Karolinska Institutet,  
18 Stockholm County Council, Stockholm Health Care Services, Stockholm  
19 2 Department of Psychology, Uppsala University  
20  
21  
22  
23

24 \* Corresponding author: Alexander Rozental, PhD, Centre for Psychiatry Research,  
25 Department of Clinical Neuroscience, Karolinska Institutet, 117 63 Stockholm  
26 Phone: +46 73 693 79 48, Email: alexander.rozentel@ki.se  
27  
28  
29  
30  
31  
32  
33  
34  
35  
36  
37  
38  
39  
40  
41  
42  
43  
44  
45  
46  
47  
48  
49  
50  
51  
52  
53  
54  
55  
56  
57  
58  
59  
60

## Abstract

**Introduction:** Patient-Controlled Admissions (PCA) represent a change in psychiatric inpatient care where patients are allowed to decide for themselves when hospitalization might be required. Prior research has demonstrated that PCA increase the number of admissions, but decrease days in inpatient care, while both the admissions to and days in involuntary care decrease. However, investigations have been restricted to specific patient groups and have not examined other possible benefits, such as effects on symptoms, quality of life, and autonomy.

**Design and methods** **Methods and analysis:** The present study explores the implementation process and effects of PCA in Region Stockholm, who is currently introducing PCA for all patients with severe psychiatric conditions and extensive healthcare utilization. In total, the study comprises approximately 45 inpatient wards, including child and adolescent psychiatry. In a naturalistic evaluation, patients assigned PCA will be followed up to 36 months, both with regard to hospitalization rates and self-reported outcomes. In addition, qualitative studies will explore the experiences of patients, caregivers of adolescents, and healthcare providers.

**Ethics and dissemination:** Approval has been granted by the Swedish Ethical Review Authority (Dnr: 2020-06498). Registration as a clinical trial has been made on [www.ClinicalTrials.gov](http://www.ClinicalTrials.gov) (NCT04862897). The findings from the present study will be disseminated via publications in international peer-reviewed journals, at scientific conferences, as part of two doctoral theses, and through the Swedish Partnership for Mental Health (NSPH).

### Article summary

- Patient-Controlled Admissions (PCA) allow patients with severe psychiatric conditions to decide for themselves when inpatient care is warranted.
- The present study will examine hospitalization rates and self-reported outcomes for patients assigned PCA in Region Stockholm, Sweden.
- Patient with different psychiatric disorders from approximately 45 inpatient wards with will be included and followed up to 36 months.
- For the first time, the implications of PCA for child and adolescent psychiatry will be investigated.
- Qualitative studies will explore the experiences of patients, caregivers of adolescents, and healthcare providers.

## Introduction

Patients with severe psychiatric conditions, such as schizophrenia spectrum disorders, borderline personality disorder, and eating disorders, often have care needs that warrant frequent admissions to inpatient care. Historically, it has been up to the healthcare providers to decide who and when to admit, sometimes referred to as the gate-keeper model. In essence, patients may seek care on their own, but the final decision to permit admission has always been made by a physician.<sup>1</sup> However, recent trends toward patient participation and shared decision-making in healthcare has questioned this practice.<sup>2</sup> In particular, the concept of Patient-Controlled Admissions (PCA) marks a dramatic shift in authority and increased partnership in psychiatric inpatient care, whereby patients are given the possibility of admitting themselves when needed. The basic premise is to identify and grant PCA to those who might benefit the most from its use as a way of preventing deterioration and novel bouts of illness and support patient empowerment. The procedures differ somewhat between settings and patient groups, but typically involves three to five inpatient days per stay, with or without restrictions regarding the number of admissions allowed per month.<sup>1</sup>

The effects of PCA have been examined in several studies. Early attempts of implementation were done in the United States and Australia, but the first large-scale investigations were made in the Netherlands, Norway, Denmark, and Sweden.<sup>3-10</sup> In sum, research indicates an increase in the number of admissions to inpatient care, but a decrease in the number of days in inpatient care. Meanwhile, both the admissions to and days in involuntary care decrease, suggesting that patients admit themselves more often, but require less frequent admissions of shorter duration, in line with the idea of using PCA to promote independence and increase help-seeking behaviors. However, apart from hospitalization rates, self-rated outcomes have been far less explored. Aspects such as recovery and well-being do not demonstrate any significant changes, but self-report measures have been few and mainly focused on general functioning.<sup>4 8 9</sup> Yet, qualitative studies imply that PCA can be beneficial in terms of increasing autonomy, agency, and well-being among patients. This is evident even in those cases where admissions are seldom or never used, suggesting that it might constitute a safety net for those at risk.<sup>11</sup>

PCA has been available since 2014 in Region Stockholm's psychiatric care, which is Sweden's largest hospital sector, but only for specific patient groups; schizophrenia spectrum disorders,<sup>7</sup> eating disorders,<sup>9</sup> and borderline personality disorder.<sup>12</sup> Different procedures for using PCA have also been used depending on diagnosis, such as the length of each stay. However, following a resolution by the popularly elected Region Stockholm Assembly, the implementation of PCA will be completed in 2023 and involve patients with severe psychiatric conditions, irrespective of diagnosis, using the same procedures in the whole region. This will allow a large-scale implementation and evaluation of its effects, both in terms of hospitalization rates and self-reported outcomes, up to 36 months following the assignment to PCA. A large number of patients with many different diagnoses will take part in several quantitative studies; including substance use, which has never been the subject to evaluation of PCA before. Furthermore, the use of additional self-report measures will permit an examination of its impact on symptoms, quality of life, and autonomy. In addition, the implementation of PCA in child and adolescent psychiatry will be the first of its kind, making it possible to examine its potential effects among adolescents. Lastly, qualitative studies will examine the experiences of patients, caregivers of adolescents, and healthcare providers in an attempt to understand the use, and potential benefits and drawbacks of PCA. Overall, approximately 45 inpatient wards will eventually be included in the present study, thus being, to the best of the authors' knowledge, the largest attempt at defining the effects of PCA.

## **Aims and objectives**

The overall aim of the present study is to assess the effects of implementing PCA throughout Region Stockholm, using a naturalistic prospective study design. This involves a number of quantitative studies which intend to understand the impact of PCA on hospitalization rates and self-reported outcomes when introduced in psychiatric care. Qualitative studies will also be conducted to explore the experiences of both patients and healthcare providers with regard to its effects and use, including the perspective of caregivers of adolescents.

### *Primary research question:*

For patients with severe psychiatric conditions, identified as having extensive care needs and who have been assigned PCA by their healthcare providers; how will their hospitalization rates change during the following 12, 24, and 36 months with regard to the number of admissions and days in inpatient care, and the number of admissions and days in involuntary care?

### *Secondary research question:*

- 1) Will hospitalization rates differ between the various patient groups who have been assigned PCA?
- 2) Will self-reported outcomes change following the assignment of PCA, i.e., symptoms, quality of life, and autonomy?
- 3) Will self-reported outcomes differ between the various patient groups who have been assigned PCA?
- 4) How are the health care expenditures for patients who have been assigned PCA affected, and do they differ between the various patient groups?
- 5) What are the experiences of patients who have been assigned PCA for at least 12 months?
- 6) What are the experiences of healthcare providers who have worked with PCA for at least 12 months?
- 7) For adolescents, what are the experiences of caregivers to patients who have been assigned PCA for at least 12 months?
- 8) For adolescents, will self-reported outcomes change in terms of their caregivers' perception of the patients' symptoms and quality of life?

In line with prior research, the present study hypothesizes that a) the hospitalization rates of patients will increase in terms of number of admissions to inpatient care, but b) decrease in terms of days in inpatient care, as well as number of admissions and days in involuntary care. Furthermore, self-reported outcomes are expected to demonstrate c) a decrease in symptoms, and d) increase in quality of life and autonomy. Lastly, qualitative investigations are believed to give a greater understanding of how patients, caregivers of adolescents, and healthcare providers experience the use of PCA.

## **Method and analysis**

### ***Setting***

1  
2  
3 The present study is placed within the psychiatric care of Region Stockholm, which is the  
4 largest hospital sector in Sweden, serving a population of two million citizens. It is organized  
5 as nine public healthcare clinics, and four private healthcare clinics. One of these clinics  
6 constitute child and adolescent psychiatry, two concern eating disorders, and two are  
7 dedicated to substance use disorders. One additional clinic is reserved for forensic psychiatry,  
8 but because its patients have been sentenced to care, these are not eligible to receive PCA.  
9 The 13 clinics that are included consist of approximately 45 inpatient wards and about 120  
10 outpatient units that work together as pairs (i.e., more than one outpatient unit can share the  
11 same inpatient ward). Each inpatient ward will in turn designate at least one bed for PCA.  
12 The healthcare providers consist of medical doctors and nurses with or without specialist  
13 training in psychiatry, mental health workers, counsellors, psychologists, psychotherapists,  
14 social workers, physiotherapists, occupational therapists, and students undergoing basic or  
15 advanced clinical training in the field of medicine or psychiatry.  
16  
17  
18

### 19 ***Patients***

20 In Region Stockholm, PCA is assigned to those patients that have a severe psychiatric  
21 condition and who are deemed by their healthcare providers to warrant great care needs.  
22 Thus, eligible patients present with a documented history of recurrent admissions to inpatient  
23 care, a large number of days in inpatient care, or other indications of future hospitalization. In  
24 order to determine eligibility, the following criteria are used by the healthcare providers:  
25

- 26 • Ongoing contact with an outpatient unit.
- 27 • An individual care plan and crisis plan.
- 28 • At least one episode of inpatient care during the previous one-year period.
- 29 • Expected future need of inpatient care.
- 30 • Demonstrating an interest in and understanding the concept of PCA (for adolescents,  
31 this also includes their caregivers).
- 32
- 33
- 34

35  
36 The inpatient wards include patients from general psychiatry (e.g., schizophrenia spectrum  
37 diagnoses, neuropsychiatric disorders, and anxiety disorders), geriatric psychiatry, affective  
38 disorders (e.g., bipolar disorder), substance use disorders, personality disorders, eating  
39 disorders, and child and adolescent psychiatry (i.e., up to 18 years of age).  
40

### 41 ***Procedure***

42 Patients who are eligible to receive PCA are invited to a scheduled meeting with their  
43 healthcare providers from the outpatient unit and inpatient ward. The purpose and practice of  
44 PCA are then discussed verbally and information is provided in writing. Should the patient  
45 accept the offer, an agreement on the use of PCA is reached collaboratively and recorded in  
46 their medical records. For adolescents, caregivers also have to agree. Typically, PCA  
47 involves up to four days of inpatient care at a time, up to three times per month, although  
48 exceptions to the rule can sometimes be made. The agreement only covers 12 months at a  
49 time, after which it can be renewed at the yearly assessments. After the meeting, the patient  
50 receives all of the details in text and a printed copy of the agreement.  
51  
52  
53

54 Each inpatient ward has allocated at least one inpatient bed for patients assigned PCA.  
55 Should a patient with an agreement wish to be admitted, they only have to contact the  
56 inpatient ward, any time of the day, any day of the week. In case the inpatient bed is already  
57 occupied, the patient is put on a waiting list. If more immediate care is required, the patient  
58 can always be admitted as usual. All admissions are managed by a nurse with delegated  
59 responsibility from the head of clinic. During admission, the patient is assessed with regard to  
60



1  
2  
3 suicidality, violence, and vital parameters, such as blood pressure and body temperature.  
4 Should there be an increased risk (e.g., suicidal ideation and physical injury), regular intake is  
5 made. Once admitted, patients are offered care according to their specific needs and  
6 individual care plan. Consultation with a medical doctor is possible, but not part of usual  
7 practice. The patient is also free to discharge at will, which is also handled by a nurse;  
8 however, should the patient warrant further stay at the inpatient ward, a medical doctor can  
9 decide if regular admittance is necessary.  
10  
11

12 Since PCA is part of regular healthcare, patients can always agree to its use but refuse to  
13 participate in the present research study. The offer to take part in a study on the effects of  
14 PCA is always made after the use of PCA first has been agreed upon, whereupon the  
15 objectives of the present study is discussed verbally and information is provided in writing.  
16 Informed consent is required and documented in the medical records. For adolescents,  
17 informed consent needs to be signed by both the adolescent and all caregivers (e.g., legal  
18 parents, custodians, or other entities responsible for the patient's care). Following this, the  
19 patient completes the self-reported outcome questionnaires that are included in the study, as  
20 reviewed below. For adolescents, this also involves the caregivers' perception of the patient's  
21 well-being. All of the self-reported outcome questionnaires are then completed at the  
22 mandatory yearly assessments, except for the Visual Analogue Scales (VAS) that are  
23 administered each month via SMS (more information provided under self-reported  
24 outcomes). This is in line with the procedures surrounding the use of PCA in Region  
25 Stockholm, where mandatory yearly assessments are made to check up on patients' health  
26 status and whether or not PCA should be continued. This is also believed to improve data  
27 collection as it does not require paper-and-pencil administration or letters.  
28  
29  
30  
31

32 The implementation of PCA throughout Region Stockholm is coordinated and supported by  
33 the Centre for Psychiatry Research, which is a R&D center run jointly by Karolinska  
34 Institutet and the hospital sector. The Centre for Psychiatry Research performs an assessment  
35 of the risks and needs of each outpatient unit and inpatient ward, and provides training and  
36 supervision regarding all of the PCA routines. This consists of an online course and a half-  
37 day on-site workshop, and the latter of regular meetings with all of the healthcare providers.  
38 The Centre for Psychiatry Research is also responsible for evaluating the effects of PCA and  
39 has a research steering group consisting of the authors of the current study protocol. These  
40 range from doctoral candidates to senior-level researchers with comprehensive experience of  
41 conducting both quantitative and qualitative studies in a psychiatric setting.  
42  
43  
44

### 45 ***Study design***

46 The present study will evaluate the effects of PCA in Region Stockholm in collaboration with  
47 the Commissioner of Healthcare. This follows a resolution made by the popularly elected  
48 Region Stockholm Assembly, which means that both the implementation and policy  
49 surrounding PCA have already been decided. Hence, according to the decision, all patients  
50 with severe psychiatric conditions who are considered by their healthcare providers to have  
51 great care needs will be offered PCA as long as the criteria mentioned above are fulfilled.  
52 Furthermore, because the primary objective of the PCA program is the provision of  
53 healthcare and not research, a more complex study design using randomization on an  
54 individual or clinic level (i.e., cluster) is not allowed due to ethical and judicial reasons.  
55 Hence, the present study is restricted to a naturalistic prospective study design. Patients are  
56 followed for 12, 24, and 36 months using their medical records to check changes in  
57 hospitalization prior to (pre) and following inclusion in the PCA program (post), similar to  
58 what has been done previously.<sup>7</sup> For example, patients who are included in November 2021  
59  
60



may have hospitalization rates retrieved from the period November 2018-2020 and compared against hospitalization rates from the period November 2022-2024, depending on the availability of historical data. In terms of self-reported outcomes, patients complete the measures when being assigned PCA and at the yearly follow-up assessments, with the exception for the VAS that is administered monthly via SMS. However, in these specific cases, historical data do not exist as these measures have not been collected previously. Only patients with no previous use of PCA when they consent to take part in the present study will be analyzed, as recorded in their hospital records.

### ***Demographic variables***

Demographic variables are recorded in the patients' medical records through their social security number. These are age, gender, civil status, and children. Psychiatric disorders are entered manually by healthcare providers using the Swedish version of the International Classification of Diseases and Related Health Problems, 10<sup>th</sup> Revision (ICD-10-SE).

### ***Hospitalization rates***

Hospitalization rates are recorded in the patients' medical records when admitted to inpatient care or involuntary care (i.e., when and how long each stay lasted). This consists of number of admissions and days in inpatient care, and number of admissions and days in involuntary care. All of the healthcare providers have been trained in how to enter this information in the system, including coding schemes specifically designed for the present study in order to identify and track patients.

### ***Self-reported outcomes***

Self-reported outcome (i.e., questionnaires) are collected after the patients have been assigned PCA and consented to take part in the research. For an overview, see Table 1.

**Table 1**  
*Overview of The Self-Reported Outcomes*

| Self-report measure | Assessment   |                  |           |           |           |
|---------------------|--------------|------------------|-----------|-----------|-----------|
|                     | Assigned PCA | Monthly measures | 12 months | 24 months | 36 months |
| <b>Adults</b>       |              |                  |           |           |           |
| EQ-5D-5L            | X            |                  | X         | X         | X         |
| WHODAS              | X            |                  | X         | X         | X         |
| CGI <sup>a</sup>    | X            |                  | X         | X         | X         |
| BBQ                 | X            |                  | X         | X         | X         |
| GSE                 | X            |                  | X         | X         | X         |
| GAD-7               | X            |                  | X         | X         | X         |
| PHQ-9               | X            |                  | X         | X         | X         |
| VAS                 | X            | X                | X         | X         | X         |
| <b>Adolescents</b>  |              |                  |           |           |           |
| KIDSCREEN           | X            |                  | X         | X         | X         |
| ASSIST-Y            | X            |                  | X         | X         | X         |
| C-GAS <sup>a</sup>  | X            |                  | X         | X         | X         |
| SDQ <sup>b</sup>    | X            |                  | X         | X         | X         |
| RCADS <sup>b</sup>  | X            |                  | X         | X         | X         |

WHODAS = World Health Organization Disability Assessment Schedule 2.0; CGI = Clinical Global Impression; BBQ = Brunnsviken Brief Quality of Life Scale; GSE = General Self-Efficacy Scale; GAD-7 =

Generalized Anxiety Disorder – 7 Items; PHQ-9 = Patient Health Questionnaire – 9 Items; VAS = Visual Analogue Scales; ASSIST-Y = Alcohol, Smoking and Substance Involvement Screening Test; C-GAS = Children’s Global Assessment Scale; SDQ = The Strengths and Difficulties Questionnaire; RCADS = Revised Children’s Anxiety and Depression Scale

<sup>a</sup> Clinician-rating scale

<sup>b</sup> Also completed by caregivers

EQ-5D-5L: A five-item questionnaire on current health status on the dimensions; mobility, self-care, usual activities (e.g., family), pain/discomfort, and anxiety/depression. Each item is scored in relation to a five-step scale, e.g., “I am not anxious or depressed” (1) to “I am extremely anxious or depressed” (5). Furthermore, EQ-5D-5L also includes a VAS on current health status; “Worst imaginable health” (0) to “Best imaginable health” (100).<sup>13</sup>

World Health Organization Disability Assessment Schedule 2.0 (WHODAS): A 12-item questionnaire on overall physical and psychological well-being, e.g., “In the past 30 days, how much difficulty did you have in: Taking care of household responsibilities?”. It is scored on five-point Likert-scale, “None” (1) to “Extreme or cannot do” (5). Three additional items also concern the number of days difficulties were present or interfered with daily living.<sup>14</sup>

Clinical Global Impression (CGI): A clinician-rating scale that asks healthcare providers to rate the health status of a patient at an initial assessment (referred to CGI-S); “Normal, not at all ill” (1) to “Among the most extremely ill patients” (7). The CGI is also used to determine the improvement of a patient (referred to as CGI-I); “Very much improved since the initiation of treatment” (1) to “Very much worse since the initiation of treatment” (7).<sup>15</sup>

Brunnsviken Brief Quality of Life Scale (BBQ): A 12-item questionnaire on the quality of life in six domains; leisure time, view of life, creativity, learning, friends and friendship, and myself as a person. Each domain is scored in accordance with satisfaction and importance, “Do not agree at all” (0) and “Agree completely” (4), which are then multiplied. The sum of the six products constitutes the total quality of life score.<sup>16</sup>

General Self-Efficacy Scale (GSE): A 10-item questionnaire on self-efficacy, i.e., the belief to succeed in a given situation or task, e.g., “I can always manage to solve difficult problems if I try hard enough” (Item 1). It is scored on a four-point Likert-scale, “Not at all true” (1) to “Exactly true” (4).<sup>17</sup>

Generalized Anxiety Disorder – 7 Items (GAD-7): A seven-item questionnaire on symptoms of anxiety and worry, e.g., “How often have they been bothered by the following over the past 2 weeks? Feeling nervous, anxious, or on the edge” (Item 1). It is scored on a four-point Likert-scale, “Not at all” (0) to “Nearly every day” (3).<sup>18</sup>

Patient Health Questionnaire – 9 Items (PHQ-9): A nine-item questionnaire on symptoms of depression and mood, e.g., “How often have they been bothered by the following over the past 2 weeks? Little interest or pleasure in doing things?” (Item 1). It is scored on a four-point Likert-scale, “Not at all” (0) to “Nearly every day” (3).<sup>19</sup>

Visual Analogue Scales (VAS): Four items assessing different aspects of the patients’ care needs and current health status are administered monthly via SMS. These include the following; 1) “I feel confident about receiving care when I need it” 2) “I am able to actively participate in my care”, and 3) “I believe care is available when needed”. These are scored on a continuum ranging from “I do not agree at all” (0) to “Totally agree” (10). Also, a fourth

1  
2  
3 item concerns “How would you rate your current health status?”, which is rated between  
4 “Worst possible health” (0) and “Best possible health” (10).  
5

6 For adolescents and their caregivers, a separate set of self-reported outcomes will be used.  
7

8  
9 KIDSCREEN: An 11-item questionnaire on aspects related to health-related quality of life,  
10 e.g., “Thinking about the last week: have you been able to do the things that you want to do  
11 in your free time?” (Item 1). It is scored on a five-point Likert-scale, “Not at all” or “Never”  
12 (0) to “Extreme” or “Always” (4). One item is supposed to reflect the participant’s overall  
13 health status, i.e., “In general, how would you say your health is?”. KIDSCREEN is  
14 administered to both the patients and their caregivers.<sup>20</sup>  
15

16  
17 Alcohol, Smoking and Substance Involvement Screening Test (ASSIST-Y): A seven-item  
18 questionnaire on alcohol, substance, and tobacco use among adolescents. It screens for the  
19 consumption and negative effects of different compounds, similar to AUDIT and DUDIT,  
20 weighting scores differently depending on frequency and impact of their use.<sup>21</sup>  
21

22  
23 Children’s Global Assessment Scale (C-GAS): A clinician-rating scale that asks healthcare  
24 providers to rate the health status of a patient. It is scored on a continuum ranging from  
25 “Needs constant supervision” (1-10) to “Superior functioning” (100).<sup>22</sup>  
26

27  
28 The Strengths and Difficulties Questionnaire (SDQ): A 25-item questionnaire on the  
29 psychological well-being of an adolescent, e.g., “Often loses temper” (Item 5). It is scored on  
30 a three-point Likert-scale, “Not true” (0) to “Certainly true” (2). SDQ is administered to both  
31 the patients and their caregivers.<sup>23</sup>  
32

33  
34 Revised Children's Anxiety and Depression Scale (RCADS): A 47-item questionnaire  
35 covering different symptoms of different psychiatric conditions, e.g., “I worry that something  
36 bad will happen to me” (Item 27). It is scored on a four-point Likert-scale, “Never” (0) to  
37 “Always” (3). RCADS is administered to both the patients and their caregivers.<sup>24</sup>  
38

39 A separate study will also investigate how the use of PCA among adolescents affect their  
40 caregivers’ quality of life (BBQ), functioning (Burden Assessment Scale),<sup>25</sup> and the  
41 perceived reception by healthcare providers (Family Involvement and Alienation  
42 Questionnaire).<sup>26</sup>  
43

### 44 **Sample size calculation**

45 The present study intends to examine the impact of introducing PCA in psychiatric care in  
46 Region Stockholm. As such, only patients who are assigned PCA and have consented to take  
47 part in the research are included. An a priori sample size calculation, which is typically used  
48 to estimate an adequate sample size for subsequent recruitment, is thus not informative.  
49 However, based on previous experiences of introducing PCA in the region, it is reasonable to  
50 expect about twelve patients per inpatient ward who consent to participate, which would  
51 amount to a total sample size of 564.<sup>7</sup> When calculating the standardized effect size possible  
52 to detect under these circumstances, based on the difference between two dependent means,  
53 and using a probability level of .05 and a power of 0.80, the result is Cohen’s *d* of 0.12,  
54 which is a small, albeit clinically relevant effect for a population of patients with severe  
55 psychiatric disorders, and in line with similar findings on self-reported outcomes.<sup>4 8 9</sup>  
56  
57  
58

### 59 **Statistical analysis**

60

1  
2  
3 Previous studies on the use of PCA have demonstrated that hospitalization rates are seldom  
4 normally distributed. In essence, few patients will use the possibility to admit themselves to  
5 inpatient care, resulting in data that is positively skewed and has a leptokurtic distribution.  
6 Investigating whether assumptions of normality are violated will therefore be essential prior  
7 to any statistical analysis, whereby suitable means of analyzing the data will be employed,  
8 that is, non-parametric tests or bootstrapping procedures. As for the self-reported outcomes,  
9 no prior evidence seems to suggest that data will not be normally distributed. Here,  
10 conditional changes over time will instead be modeled using a mixed models-approach, i.e.,  
11 multilevel models. All analyses will be made according to an intent-to-treat principle,  
12 accounting for those values that have been lost via multiple imputation or maximum  
13 likelihood estimation. Likewise, all analyses will control for potential confounders, such as  
14 hospitalization rates prior to PCA and self-reported outcomes when assigned PCA, as well as  
15 demographics available in the hospital records, e.g., age, gender, civil status, children, and  
16 psychiatric disorders.

17  
18  
19  
20  
21 Apart from studying the results of introducing PCA, the present study will also assess its  
22 cost-effectiveness, similar to a newly published study from Denmark.<sup>10</sup> This includes  
23 determining the direct and total healthcare costs prior to and after being assigned PCA. Direct  
24 costs are the expenditures associated with each visit to a psychiatric emergency department,  
25 inpatient care, and involuntary care. Such expenditures are calculated from standardized price  
26 estimates provided by Region Stockholm, resulting in an approximation of how expenditures  
27 change following the implementation of PCA. Total healthcare costs are the expenditures of  
28 other types of healthcare, e.g., visits to primary care. Moreover, cost-effectiveness-utility  
29 analyses will also entail so-called Quality Adjusted Life Years (QALYs), which represent the  
30 improvement in terms of well-being for each incremental increase in costs by allowing  
31 patients to admit themselves, i.e., a cost-utility approach. QALYs can be derived from self-  
32 reported outcomes on the EQ-5D-5L, which is commonly used for this purpose, using  
33 population-generated preference weights which are available for a Swedish setting.<sup>27</sup> This  
34 will be compared to matched patients using registries. In addition, probability sensitivity  
35 analyses will be conducted to determine the errors that surrounds the cost-effectiveness-utility  
36 calculations made. This provides confidence ellipses at 50%, 75% and 95% that represent the  
37 uncertainty associated with each estimate.

### 40 41 *Qualitative studies*

42 In addition to the quantitative studies, the present study will also involve a number of  
43 qualitative investigations to further the current understanding of its use and effects, similar to  
44 previous research in the field<sup>28 29</sup>. First, patients who have been assigned PCA for at least 12  
45 months will be recruited to share their perspective ( $n = 30$ ). Recruitment will be purposeful to  
46 ensure heterogeneity with regard to patient groups and the extent to which PCA have been  
47 used. The aim is to explore how PCA has been perceived and what impact it might have had  
48 on both day-to-day activities and quality of life. Second, healthcare providers from different  
49 inpatient wards and professional backgrounds, having had at least 12 months of experience of  
50 working with PCA, will be recruited to provide their view of its application ( $n = 30$ ). The aim  
51 is to investigate their attitudes toward the method in general, the implementation of PCA in  
52 particular, and whether these have changed over time as a result of working with PCA. Third,  
53 caregivers of adolescents who have been assigned PCA for at least 12 months will be  
54 recruited to share their experiences ( $n = 20$ ), both in terms of how they have perceived its  
55 effects for the adolescent and how it might have affected their own situation. All of the  
56 qualitative studies will be made using individual semi-structured interviews that are recorded  
57 digitally and transcribed ad verbum. Given the exploratory nature of this research, all  
58  
59  
60

1  
2  
3 analyses will be inductive and done in accordance with thematic analysis.<sup>30</sup> This approach is  
4 often used in social sciences as well as in health sciences and helps to understand the  
5 viewpoint of an individual in relation to a specific topic, phenomenon, or subject matter. This  
6 can be particularly useful in examining patterns and concepts in shared responses, which is  
7 helpful in generating hypotheses in a research field that lacks prior research.  
8  
9

### 10 **Ethics and dissemination**

11 The present study was approved in March 2021 by the Swedish Ethical Review Authority  
12 (Dnr: 2020-06498), and has been registered as a clinical trial on [www.ClinicalTrials.gov](http://www.ClinicalTrials.gov)  
13 (NCT04862897). All data is recorded using Region Stockholm's public healthcare's digital  
14 medical records system, TakeCare, and only exported for statistical analyses in an aggregated  
15 pseudonymized format. Moreover, participant identifiers instead of Swedish social security  
16 numbers are used to ensure anonymity, e.g., LSR64UFL. To participate in the research,  
17 informed consent has to be provided, and for adolescents, this includes caregivers (e.g., legal  
18 parents, custodians, or other entities responsible for the patient's care).  
19  
20

21 Given the novelty of the intervention and lack of research concerning PCA, the present study  
22 has the potential to make a significant contribution to the field. Apart from examining its  
23 effects with regard to hospitalization rates, self-reported outcomes will help to investigate  
24 possible benefits on symptoms, quality of life, and autonomy. In addition, qualitative studies  
25 will provide useful insights regarding its use and implications for care and everyday life,  
26 including the opinions of caregivers of adolescents. In order to successfully disseminate the  
27 results, findings will be presented in international peer-reviewed journals, at scientific  
28 conferences, and as part of two doctoral theses. In addition, an ongoing collaboration with  
29 patient representatives will ensure Patient Public Involvement and dissemination to patients  
30 and their significant others, primarily through the Swedish Partnership for Mental Health  
31 (NSPH).  
32  
33  
34

### 35 **Author's contributions**

36 AR, SS, TL, NJL, MSL, EA, AB, CH, MS and LF have all been involved in the design and  
37 planning of the present study. All authors have taken part in drafting the manuscript and are  
38 also part of the steering group for researching PCA in the region.  
39  
40

### 41 **Funding statement**

42 The present study, its implementation, and research is funded by the Commissioner of  
43 Healthcare in Region Stockholm.  
44  
45

### 46 **Competing interest statement**

47 None declared.  
48  
49

### 50 **Patient and public involvement**

51 The present study is conducted in collaboration with the Swedish Partnership for Mental  
52 Health (NSPH). Patient and public representatives are not involved in issues surrounding  
53 study design, but are informed about and actively engaged in formulating research questions,  
54 determining outcomes, and disseminating the results.  
55  
56  
57  
58  
59  
60



## References

1. Strand M, von Hausswolff-Juhlin Y. Patient-controlled hospital admission in psychiatry: A systematic review. *Nord J Psychiatry* 2015;69(8):574-86. doi: 10.3109/08039488.2015.1025835 [published Online First: 2015/04/03]
2. Pelto-Piri V, Engström K, Engström I. Paternalism, autonomy and reciprocity: ethical perspectives in encounters with patients in psychiatric in-patient care. *BMC medical ethics* 2013;14(1):1-8.
3. Koekkoek B, van der Snoek R, Oosterwijk K, et al. Preventive psychiatric admission for patients with borderline personality disorder: a pilot study. *Perspect Psychiatr Care* 2010;46(2):127-34. doi: 10.1111/j.1744-6163.2010.00248.x [published Online First: 2010/04/10]
4. Moljord IEO, Lara-Cabrera ML, Salvesen O, et al. Twelve months effect of self-referral to inpatient treatment on patient activation, recovery, symptoms and functioning: A randomized controlled study. *Patient Educ Couns* 2017;100(6):1144-52. doi: 10.1016/j.pec.2017.01.008 [published Online First: 2017/01/18]
5. Moljord IE, Helland-Hansen KA, Salvesen O, et al. Short time effect of a self-referral to inpatient treatment for patients with severe mental disorders: a randomized controlled trial. *BMC Health Serv Res* 2016;16(1):513. doi: 10.1186/s12913-016-1712-z [published Online First: 2016/09/24]
6. Thomsen CT, Benros ME, Maltesen T, et al. Patient-controlled hospital admission for patients with severe mental disorders: a nationwide prospective multicentre study. *Acta Psychiatr Scand* 2018;137(4):355-63. doi: 10.1111/acps.12868 [published Online First: 2018/03/06]
7. Skott M, Durbeej N, Smitmanis-Lyle M, et al. Patient-controlled admissions to inpatient care: A twelve-month naturalistic study of patients with schizophrenia spectrum diagnoses and the effects on admissions to and days in inpatient care. *BMC Health Serv Res* 2021;21(1):598. doi: 10.1186/s12913-021-06617-8 [published Online First: 2021/06/25]
8. Westling S, Daukantaite D, Liljedahl SI, et al. Effect of Brief Admission to Hospital by Self-referral for Individuals Who Self-harm and Are at Risk of Suicide: A Randomized Clinical Trial. *JAMA Netw Open* 2019;2(6):e195463. doi: 10.1001/jamanetworkopen.2019.5463 [published Online First: 2019/06/08]
9. Strand M, Bulik CM, Gustafsson SA, et al. Self-admission to inpatient treatment in anorexia nervosa: Impact on healthcare utilization, eating disorder morbidity, and quality of life. *Int J Eat Disord* 2020 doi: 10.1002/eat.23346 [published Online First: 2020/07/16]
10. Paaske LS, Sopina L, Olsen KR, et al. The impact of patient-controlled hospital admissions among patients with severe mental disorders on health care cost: A nationwide register-based cohort study using quasi-experimental design. *J Psychiatr Res* 2021;144:331-37. doi: 10.1016/j.jpsychires.2021.10.032 [published Online First: 2021/11/06]
11. Olso TM, Gudde CB, Moljord IE, et al. More than just a bed: mental health service users' experiences of self-referral admission. *Int J Ment Health Syst* 2016;10:11. doi: 10.1186/s13033-016-0045-y [published Online First: 2016/02/27]
12. Eckerström J, Flyckt L, Carlborg A, et al. Brief admission for patients with emotional instability and self-harm: A qualitative analysis of patients' experiences during crisis. *International Journal of Mental Health Nursing* 2020 doi: 10.1111/inm.12736
13. Herdman M, Gudex C, Lloyd A, et al. Development and preliminary testing of the new five-level version of EQ-5D (EQ-5D-5L). *Quality of life research* 2011;20(10):1727-36.

14. Üstün TB, Kostanjsek N, Chatterji S, et al. Measuring health and disability: Manual for WHO disability assessment schedule WHODAS 2.0: World Health Organization 2010.
15. Busner J, Targum SD. The Clinical Global Impressions Scale: Applying a research tool in clinical practice. *Psychiatry (Edgmont)* 2007;4(7):28-37.
16. Lindner P, Frykheden O, Forsstrom D, et al. The Brunnsviken Brief Quality of Life Scale (BBQ): Development and Psychometric Evaluation. *Cogn Behav Ther* 2016;45(3):182-95. doi: 10.1080/16506073.2016.1143526 [published Online First: 2016/02/18]
17. Sherer M, Maddux JE, Mercandante B, et al. The self-efficacy scale: Construction and validation. *Psychological reports* 1982;51(2):663-71.
18. Spitzer RL, Kroenke K, Williams JB, et al. A brief measure for assessing generalized anxiety disorder: the GAD-7. *Archives of internal medicine* 2006;166(10):1092-97.
19. Kroenke K, Spitzer RL, Williams JB. The PHQ-9: validity of a brief depression severity measure. *Journal of general internal medicine* 2001;16(9):606-13.
20. Ravens-Sieberer U, Gosch A, Rajmil L, et al. KIDSCREEN-52 quality-of-life measure for children and adolescents. *Expert review of pharmacoeconomics & outcomes research* 2005;5(3):353-64.
21. Humeniuk R, Holmwood C, Beshara M, et al. ASSIST-Y V1. 0: First-Stage Development of the WHO Alcohol, Smoking and Substance Involvement Screening Test (ASSIST) and linked brief intervention for young people. *Journal of Child & Adolescent Substance Abuse* 2016;25(4):384-90.
22. Shaffer D, Gould MS, Brasic J, et al. A children's global assessment scale (CGAS). *Archives of General psychiatry* 1983;40(11):1228-31.
23. Goodman R. The Strengths and Difficulties Questionnaire: a research note. *Journal of child psychology and psychiatry* 1997;38(5):581-86.
24. Chorpita BF, Yim L, Moffitt C, et al. Assessment of symptoms of DSM-IV anxiety and depression in children: A revised child anxiety and depression scale. *Behaviour research and therapy* 2000;38(8):835-55.
25. Ewertzon M, Lützn K, Svensson E, et al. Developing the concept of family involvement and the alienation questionnaire in the context of psychiatric care. *International Journal of Mental Health Nursing* 2008;17(6):439-49.
26. Reinhard SC, Gubman GD, Horwitz AV, et al. Burden assessment scale for families of the seriously mentally ill. *Evaluation and program planning* 1994;17(3):261-69.
27. Burström K, Sun S, Gerdtham U-G, et al. Swedish experience-based value sets for EQ-5D health states. *Quality of Life Research* 2014;23(2):431-42.
28. Ellegaard T, Bliksted V, Lomborg K, et al. Use of patient-controlled psychiatric hospital admissions: patients' perspective. *Nord J Psychiatry* 2017;71(5):370-77. doi: 10.1080/08039488.2017.1302505 [published Online First: 2017/03/23]
29. Ellegaard T, Mehlsen M, Lomborg K, et al. Use of patient-controlled psychiatric hospital admissions: mental health professionals' perspective. *Nord J Psychiatry* 2017;71(5):362-69. doi: 10.1080/08039488.2017.1301548 [published Online First: 2017/03/21]
30. Braun V, Clarke V. Using thematic analysis in psychology. *Qualitative Research in Psychology* 2006;3(2):77-101. doi: 10.1191/1478088706qp063oa



# BMJ Open

## What are the effects of implementing patient-controlled admissions in inpatient care? A study protocol of a large-scale implementation and naturalistic evaluation for adult and adolescent patients with severe psychiatric conditions throughout Region Stockholm

|                                 |                                                                                                                                                                                                                                                                                                                                                                                                                                                                                                                                                                                                                                                                                                                                                                                                                                                                                                             |
|---------------------------------|-------------------------------------------------------------------------------------------------------------------------------------------------------------------------------------------------------------------------------------------------------------------------------------------------------------------------------------------------------------------------------------------------------------------------------------------------------------------------------------------------------------------------------------------------------------------------------------------------------------------------------------------------------------------------------------------------------------------------------------------------------------------------------------------------------------------------------------------------------------------------------------------------------------|
| Journal:                        | <i>BMJ Open</i>                                                                                                                                                                                                                                                                                                                                                                                                                                                                                                                                                                                                                                                                                                                                                                                                                                                                                             |
| Manuscript ID                   | bmjopen-2022-065770.R1                                                                                                                                                                                                                                                                                                                                                                                                                                                                                                                                                                                                                                                                                                                                                                                                                                                                                      |
| Article Type:                   | Protocol                                                                                                                                                                                                                                                                                                                                                                                                                                                                                                                                                                                                                                                                                                                                                                                                                                                                                                    |
| Date Submitted by the Author:   | 02-Aug-2022                                                                                                                                                                                                                                                                                                                                                                                                                                                                                                                                                                                                                                                                                                                                                                                                                                                                                                 |
| Complete List of Authors:       | Smitmanis Lyle, Maria; Stockholm Health Care Services, Department of Clinical Neuroscience<br>Allenius, Emelie; Stockholm Health Care Services, Department of Clinical Neuroscience<br>Salomonsson, Sigrid; Stockholm Health Care Services, Department of Clinical Neuroscience<br>Björkdahl, Anna; Stockholm Health Care Services, Department of Clinical Neuroscience<br>Strand, Mattias; Stockholm Health Care Services, Department of Clinical Neuroscience<br>Flyckt, Lena; Karolinska Institutet<br>Hellner, Clara; Karolinska Institute, Clinical neuroscience<br>Lundgren, Tobias; Karolinska Institute, Clinical Neuro Science ;<br>Jayaram-Lindström, Nitya; Karolinska Institutet, Centre for Psychiatry Research, Department of Clinical Neuroscience<br>Rozental, Alexander; Stockholm Health Care Services, Department of Clinical Neuroscience; Uppsala University, Department of Psychology |
| <b>Primary Subject Heading</b>: | Mental health                                                                                                                                                                                                                                                                                                                                                                                                                                                                                                                                                                                                                                                                                                                                                                                                                                                                                               |
| Secondary Subject Heading:      | Mental health, Patient-centred medicine, Public health                                                                                                                                                                                                                                                                                                                                                                                                                                                                                                                                                                                                                                                                                                                                                                                                                                                      |
| Keywords:                       | Adult psychiatry < PSYCHIATRY, Child & adolescent psychiatry < PSYCHIATRY, PSYCHIATRY                                                                                                                                                                                                                                                                                                                                                                                                                                                                                                                                                                                                                                                                                                                                                                                                                       |
|                                 |                                                                                                                                                                                                                                                                                                                                                                                                                                                                                                                                                                                                                                                                                                                                                                                                                                                                                                             |

SCHOLARONE™  
Manuscripts

1  
2  
3 **What are the effects of implementing patient-controlled admissions in inpatient care? A**  
4 **study protocol of a large-scale implementation and naturalistic evaluation for adult and**  
5 **adolescent patients with severe psychiatric conditions throughout Region Stockholm**  
6  
7  
8  
9

10 Maria Smitmanis Lyle<sup>1</sup>; Emelie Allenius<sup>1</sup>; Sigrid Salomonsson<sup>1</sup>; Anna Björkdahl<sup>1</sup>;  
11 Mattias Strand<sup>1</sup>; Lena Flyckt<sup>1</sup>; Clara Hellner<sup>1</sup>; Tobias Lundgren<sup>1</sup>; Nitya Jayaram-Lindström<sup>1</sup>;  
12 Alexander Rozental<sup>1,2\*</sup>  
13  
14  
15  
16

17 1 Centre for Psychiatry Research, Department of Clinical Neuroscience, Karolinska Institutet,  
18 Stockholm County Council, Stockholm Health Care Services, Stockholm  
19 2 Department of Psychology, Uppsala University  
20  
21  
22  
23

24 \* Corresponding author: Alexander Rozental, PhD, Centre for Psychiatry Research,  
25 Department of Clinical Neuroscience, Karolinska Institutet, 117 63 Stockholm  
26 Phone: +46 73 693 79 48, Email: alexander.rozentel@ki.se  
27  
28  
29  
30  
31  
32  
33  
34  
35  
36  
37  
38  
39  
40  
41  
42  
43  
44  
45  
46  
47  
48  
49  
50  
51  
52  
53  
54  
55  
56  
57  
58  
59  
60

## Abstract

**Introduction:** Patient-Controlled Admissions (PCA) represent a change in psychiatric inpatient care where patients are allowed to decide for themselves when hospitalization might be required. Prior research has demonstrated that PCA increase the number of admissions, but decrease days in inpatient care, while both the admissions to and days in involuntary care decrease. However, investigations have been restricted to specific patient groups and have not examined other possible benefits, such as effects on symptoms, quality of life, and autonomy.

**Methods and analysis:** The present study explores the implementation process and effects of PCA in Region Stockholm, who is currently introducing PCA for all patients with severe psychiatric conditions and extensive healthcare utilization. In total, the study comprises approximately 45 inpatient wards, including child and adolescent psychiatry. In a naturalistic evaluation, patients assigned PCA will be followed up to 36 months, both with regard to hospitalization rates and self-reported outcomes. In addition, qualitative studies will explore the experiences of patients, caregivers of adolescents, and healthcare providers.

**Ethics and dissemination:** Approval has been granted by the Swedish Ethical Review Authority (Dnr: 2020-06498). Registration as a clinical trial has been made on [www.ClinicalTrials.gov](http://www.ClinicalTrials.gov) (NCT04862897). The findings from the present study will be disseminated via publications in international peer-reviewed journals, at scientific conferences, as part of two doctoral theses, and through the Swedish Partnership for Mental Health (NSPH).

### Strengths and limitations of this study

- The present study will examine hospitalization rates and self-reported outcomes for all patients assigned Patient-Controlled Admissions (PCA) in Region Stockholm, Sweden.
- Patient with different psychiatric disorders from approximately 45 inpatient wards will be included and followed up to 36 months.
- For the first time, the implications of PCA for child and adolescent psychiatry will be investigated.
- Qualitative studies will explore the experiences of patients, caregivers of adolescents, and healthcare providers.
- Due to ethical and judicial reasons, the present study will not allow randomization of patients or clusters, affecting the possibility of drawing causal inferences of outcomes.

## Introduction

Patients with severe psychiatric conditions, such as schizophrenia spectrum disorders, borderline personality disorder, and eating disorders, often have care needs that warrant frequent admissions to inpatient care. Historically, it has been up to the healthcare providers to decide who and when to admit, sometimes referred to as the gate-keeper model. In essence, patients may seek care on their own, but the final decision to permit admission has always been made by a physician.<sup>1</sup> However, recent trends toward patient participation and shared decision-making in healthcare has questioned this practice.<sup>2</sup> In particular, the concept of Patient-Controlled Admissions (PCA) marks a dramatic shift in authority and increased partnership in psychiatric inpatient care, whereby patients are given the possibility of admitting themselves when needed. The basic premise is to identify and grant PCA to those who might benefit the most from its use as a way of preventing deterioration and novel bouts of illness and support patient empowerment. The procedures differ somewhat between settings and patient groups, but typically involves three to five inpatient days per stay, with or without restrictions regarding the number of admissions allowed per month.<sup>1</sup>

The effects of PCA have been examined in several studies. Early attempts of implementation were done in the United States and Australia, but the first large-scale investigations were made in the Netherlands, Norway, Denmark, and Sweden.<sup>3-10</sup> In sum, research indicates an increase in the number of admissions to inpatient care, but a decrease in the number of days in inpatient care. Meanwhile, both the admissions to and days in involuntary care decrease, suggesting that patients admit themselves more often, but require less frequent admissions of shorter duration, in line with the idea of using PCA to promote independence and increase help-seeking behaviors. However, apart from hospitalization rates, self-rated outcomes have been far less explored. Aspects such as recovery and well-being do not demonstrate any significant changes, but self-report measures have been few and mainly focused on general functioning.<sup>4 8 9</sup> Yet, qualitative studies imply that PCA can be beneficial in terms of increasing autonomy, agency, and well-being among patients. This is evident even in those cases where admissions are seldom or never used, suggesting that it might constitute a safety net for those at risk.<sup>11</sup>

PCA has been available since 2014 in Region Stockholm's psychiatric care, which is Sweden's largest hospital sector, but only for specific patient groups; schizophrenia spectrum disorders,<sup>7</sup> eating disorders,<sup>9</sup> and borderline personality disorder.<sup>12</sup> Different procedures for using PCA have also been used depending on diagnosis, such as the length of each stay. However, following a resolution by the popularly elected Region Stockholm Assembly, the implementation of PCA will be completed in 2023 and involve patients with severe psychiatric conditions, irrespective of diagnosis, using the same procedures in the whole region. This will allow a large-scale implementation and evaluation of its effects, both in terms of hospitalization rates and self-reported outcomes, up to 36 months following the assignment to PCA. A large number of patients with many different diagnoses will take part in several quantitative studies; including substance use, which has never been the subject to evaluation of PCA before. Furthermore, the use of additional self-report measures will permit an examination of its impact on symptoms, quality of life, and autonomy. In addition, the implementation of PCA in child and adolescent psychiatry will be the first of its kind, making it possible to examine its potential effects among adolescents. Lastly, qualitative studies will examine the experiences of patients, caregivers of adolescents, and healthcare providers in an attempt to understand the use, and potential benefits and drawbacks of PCA. Overall, approximately 45 inpatient wards will eventually be included in the present study, thus being, to the best of the authors' knowledge, the largest attempt at defining the effects of PCA.

## **Aims and objectives**

The overall aim of the present study is to assess the effects of implementing PCA throughout Region Stockholm, using a naturalistic prospective study design. This involves a number of quantitative studies which intend to understand the impact of PCA on hospitalization rates and self-reported outcomes when introduced in psychiatric care. Qualitative studies will also be conducted to explore the experiences of both patients and healthcare providers with regard to its effects and use, including the perspective of caregivers of adolescents.

### *Primary research question:*

For patients with severe psychiatric conditions, identified as having extensive care needs and who have been assigned PCA by their healthcare providers; how will their hospitalization rates change during the following 12, 24, and 36 months with regard to the number of admissions and days in inpatient care, and the number of admissions and days in involuntary care?

### *Secondary research question:*

- 1) Will hospitalization rates differ between the various patient groups who have been assigned PCA?
- 2) Will self-reported outcomes change following the assignment of PCA, i.e., symptoms, quality of life, and autonomy?
- 3) Will self-reported outcomes differ between the various patient groups who have been assigned PCA?
- 4) How are the health care expenditures for patients who have been assigned PCA affected, and do they differ between the various patient groups?
- 5) What are the experiences of patients who have been assigned PCA for at least 12 months?
- 6) What are the experiences of healthcare providers who have worked with PCA for at least 12 months?
- 7) For adolescents, what are the experiences of caregivers to patients who have been assigned PCA for at least 12 months?
- 8) For adolescents, will self-reported outcomes change in terms of their caregivers' perception of the patients' symptoms and quality of life?

In line with prior research, the present study hypothesizes that a) the hospitalization rates of patients will increase in terms of number of admissions to inpatient care, but b) decrease in terms of days in inpatient care, as well as number of admissions and days in involuntary care. Furthermore, self-reported outcomes are expected to demonstrate c) a decrease in symptoms, and d) increase in quality of life and autonomy. Lastly, qualitative investigations are believed to give a greater understanding of how patients, caregivers of adolescents, and healthcare providers experience the use of PCA.

## **Method and analysis**

### ***Setting***

1  
2  
3 The present study is placed within the psychiatric care of Region Stockholm, which is the  
4 largest hospital sector in Sweden, serving a population of two million citizens. It is organized  
5 as nine public healthcare clinics, and four private healthcare clinics. One of these clinics  
6 constitute child and adolescent psychiatry, two concern eating disorders, and two are  
7 dedicated to substance use disorders. One additional clinic is reserved for forensic psychiatry,  
8 but because its patients have been sentenced to care, these are not eligible to receive PCA.  
9 The 13 clinics that are included consist of approximately 45 inpatient wards and about 120  
10 outpatient units that work together as pairs (i.e., more than one outpatient unit can share the  
11 same inpatient ward). Each inpatient ward will in turn designate at least one bed for PCA.  
12 The healthcare providers consist of medical doctors and nurses with or without specialist  
13 training in psychiatry, mental health workers, counsellors, psychologists, psychotherapists,  
14 social workers, physiotherapists, occupational therapists, and students undergoing basic or  
15 advanced clinical training in the field of medicine or psychiatry. The starting date of the  
16 present study was January 1, 2022, and the planned end date is December 31, 2027.  
17  
18  
19

### 20 ***Patients***

21 In Region Stockholm, PCA is assigned to those patients that have a severe psychiatric  
22 condition and who are deemed by their healthcare providers to warrant great care needs.  
23 Thus, eligible patients present with a documented history of recurrent admissions to inpatient  
24 care, a large number of days in inpatient care, or other indications of future hospitalization. In  
25 order to determine eligibility, the following criteria are used by the healthcare providers:  
26  
27

- 28 • Ongoing contact with an outpatient unit.
- 29 • An individual care plan and crisis plan.
- 30 • At least one episode of inpatient care during the previous one-year period.
- 31 • Expected future need of inpatient care.
- 32 • Demonstrating an interest in and understanding the concept of PCA (for adolescents,  
33 this also includes their caregivers).  
34  
35

36  
37 The inpatient wards include patients from general psychiatry (e.g., schizophrenia spectrum  
38 diagnoses, neuropsychiatric disorders, and anxiety disorders), geriatric psychiatry, affective  
39 disorders (e.g., bipolar disorder), substance use disorders, personality disorders, eating  
40 disorders, and child and adolescent psychiatry (i.e., up to 18 years of age).  
41  
42

### 43 ***Procedure***

44 Patients who are eligible to receive PCA are invited to a scheduled meeting with their  
45 healthcare providers from the outpatient unit and inpatient ward. The purpose and practice of  
46 PCA are then discussed verbally and information is provided in writing. Should the patient  
47 accept the offer, an agreement on the use of PCA is reached collaboratively and recorded in  
48 their medical records. For adolescents, caregivers also have to agree. Typically, PCA  
49 involves up to four days of inpatient care at a time, up to three times per month, although  
50 exceptions to the rule can sometimes be made. The agreement only covers 12 months at a  
51 time, after which it can be renewed at the yearly assessments. After the meeting, the patient  
52 receives all of the details in text and a printed copy of the agreement.  
53  
54

55 Each inpatient ward has allocated at least one inpatient bed for patients assigned PCA.  
56 Should a patient with an agreement wish to be admitted, they only have to contact the  
57 inpatient ward, any time of the day, any day of the week. In case the inpatient bed is already  
58 occupied, the patient is put on a waiting list. If more immediate care is required, the patient  
59 can always be admitted as usual. All admissions are managed by a nurse with delegated  
60



responsibility from the head of clinic. During admission, the patient is assessed with regard to suicidality, violence, and vital parameters, such as blood pressure and body temperature. Should there be an increased risk (e.g., suicidal ideation and physical injury), regular intake is made. Once admitted, patients are offered care according to their specific needs and individual care plan. Consultation with a medical doctor is possible, but not part of usual practice. The patient is also free to discharge at will, which is also handled by a nurse; however, should the patient warrant further stay at the inpatient ward, a medical doctor can decide if regular admittance is necessary.

Since PCA is part of regular healthcare, patients can always agree to its use but refuse to participate in the present research study. The offer to take part in a study on the effects of PCA is always made after the use of PCA first has been agreed upon, whereupon the objectives of the present study is discussed verbally and information is provided in writing. Informed consent is required and documented in the medical records. For adolescents, informed consent needs to be signed by both the adolescent and all caregivers (e.g., legal parents, custodians, or other entities responsible for the patient's care). Following this, the patient completes the self-reported outcome questionnaires that are included in the study, as reviewed below. For adolescents, this also involves the caregivers' perception of the patient's well-being. All of the self-reported outcome questionnaires are then completed at the mandatory yearly assessments, except for the Visual Analogue Scales (VAS) that are administered each month via SMS (more information provided under self-reported outcomes). This is in line with the procedures surrounding the use of PCA in Region Stockholm, where mandatory yearly assessments are made to check up on patients' health status and whether or not PCA should be continued. This is also believed to improve data collection as it does not require paper-and-pencil administration or letters.

The implementation of PCA throughout Region Stockholm is coordinated and supported by the Centre for Psychiatry Research, which is a R&D center run jointly by Karolinska Institutet and the hospital sector. The Centre for Psychiatry Research performs an assessment of the risks and needs of each outpatient unit and inpatient ward, and provides training and supervision regarding all of the PCA routines. This consists of an online course and a half-day on-site workshop, and the latter of regular meetings with all of the healthcare providers. The Centre for Psychiatry Research is also responsible for evaluating the effects of PCA and has a research steering group consisting of the authors of the current study protocol. These range from doctoral candidates to senior-level researchers with comprehensive experience of conducting both quantitative and qualitative studies in a psychiatric setting.

### ***Study design***

The present study will evaluate the effects of PCA in Region Stockholm in collaboration with the Commissioner of Healthcare. This follows a resolution made by the popularly elected Region Stockholm Assembly, which means that both the implementation and policy surrounding PCA have already been decided. Hence, according to the decision, all patients with severe psychiatric conditions who are considered by their healthcare providers to have great care needs will be offered PCA as long as the criteria mentioned above are fulfilled. Furthermore, because the primary objective of the PCA program is the provision of healthcare and not research, a more complex study design using randomization on an individual or clinic level (i.e., cluster) is not allowed due to ethical and judicial reasons. Hence, the present study is restricted to a naturalistic prospective study design. Patients are followed for 12, 24, and 36 months using their medical records to check changes in hospitalization prior to (pre) and following inclusion in the PCA program (post), similar to



what has been done previously.<sup>7</sup> For example, patients who are included in November 2021 may have hospitalization rates retrieved from the period November 2018-2020 and compared against hospitalization rates from the period November 2022-2024, depending on the availability of historical data. In terms of self-reported outcomes, patients complete the measures when being assigned PCA and at the yearly follow-up assessments, with the exception for the VAS that is administered monthly via SMS. However, in these specific cases, historical data do not exist as these measures have not been collected previously. Only patients with no previous use of PCA when they consent to take part in the present study will be analyzed, as recorded in their hospital records.

### ***Patient and public involvement***

The present study is conducted in collaboration with the Swedish Partnership for Mental Health (NSPH). Patient and public representatives are not involved in issues surrounding study design, but are informed about and actively engaged in formulating research questions, determining outcomes, and disseminating the results.

### ***Demographic variables***

Demographic variables are recorded in the patients' medical records through their social security number. These are age, gender, civil status, and children. Psychiatric disorders are entered manually by healthcare providers using the Swedish version of the International Classification of Diseases and Related Health Problems, 10<sup>th</sup> Revision (ICD-10-SE).

### ***Hospitalization rates***

Hospitalization rates are recorded in the patients' medical records when admitted to inpatient care or involuntary care (i.e., when and how long each stay lasted). This consists of number of admissions and days in inpatient care, and number of admissions and days in involuntary care. All of the healthcare providers have been trained in how to enter this information in the system, including coding schemes specifically designed for the present study in order to identify and track patients.

### ***Self-reported outcomes***

Self-reported outcome (i.e., questionnaires) are collected after the patients have been assigned PCA and consented to take part in the research. For an overview, see Table 1.

**Table 1**  
*Overview of The Self-Reported Outcomes*

| Self-report measure | Assessment   |                  |           |           |           |
|---------------------|--------------|------------------|-----------|-----------|-----------|
|                     | Assigned PCA | Monthly measures | 12 months | 24 months | 36 months |
| <b>Adults</b>       |              |                  |           |           |           |
| EQ-5D-5L            | X            |                  | X         | X         | X         |
| WHODAS              | X            |                  | X         | X         | X         |
| CGI <sup>a</sup>    | X            |                  | X         | X         | X         |
| BBQ                 | X            |                  | X         | X         | X         |
| GSE                 | X            |                  | X         | X         | X         |
| GAD-7               | X            |                  | X         | X         | X         |
| PHQ-9               | X            |                  | X         | X         | X         |
| VAS                 | X            | X                | X         | X         | X         |

### **Adolescents**

|                    |   |   |   |   |
|--------------------|---|---|---|---|
| KIDSCREEN          | X | X | X | X |
| ASSIST-Y           | X | X | X | X |
| C-GAS <sup>a</sup> | X | X | X | X |
| SDQ <sup>b</sup>   | X | X | X | X |
| RCADS <sup>b</sup> | X | X | X | X |

WHODAS = World Health Organization Disability Assessment Schedule 2.0; CGI = Clinical Global Impression; BBQ = Brunnsvikien Brief Quality of Life Scale; GSE = General Self-Efficacy Scale; GAD-7 = Generalized Anxiety Disorder – 7 Items; PHQ-9 = Patient Health Questionnaire – 9 Items; VAS = Visual Analogue Scales; ASSIST-Y = Alcohol, Smoking and Substance Involvement Screening Test; C-GAS = Children's Global Assessment Scale; SDQ = The Strengths and Difficulties Questionnaire; RCADS = Revised Children's Anxiety and Depression Scale

<sup>a</sup> Clinician-rating scale

<sup>b</sup> Also completed by caregivers

EQ-5D-5L: A five-item questionnaire on current health status on the dimensions; mobility, self-care, usual activities (e.g., family), pain/discomfort, and anxiety/depression. Each item is scored in relation to a five-step scale, e.g., “I am not anxious or depressed” (1) to “I am extremely anxious or depressed” (5). Furthermore, EQ-5D-5L also includes a VAS on current health status; “Worst imaginable health” (0) to “Best imaginable health” (100).<sup>13</sup>

World Health Organization Disability Assessment Schedule 2.0 (WHODAS): A 12-item questionnaire on overall physical and psychological well-being, e.g., “In the past 30 days, how much difficulty did you have in: Taking care of household responsibilities?”. It is scored on five-point Likert-scale, “None” (1) to “Extreme or cannot do” (5). Three additional items also concern the number of days difficulties were present or interfered with daily living.<sup>14</sup>

Clinical Global Impression (CGI): A clinician-rating scale that asks healthcare providers to rate the health status of a patient at an initial assessment (referred to CGI-S); “Normal, not at all ill” (1) to “Among the most extremely ill patients” (7). The CGI is also used to determine the improvement of a patient (referred to as CGI-I); “Very much improved since the initiation of treatment” (1) to “Very much worse since the initiation of treatment” (7).<sup>15</sup>

Brunnsvikien Brief Quality of Life Scale (BBQ): A 12-item questionnaire on the quality of life in six domains; leisure time, view of life, creativity, learning, friends and friendship, and myself as a person. Each domain is scored in accordance with satisfaction and importance, “Do not agree at all” (0) and “Agree completely” (4), which are then multiplied. The sum of the six products constitutes the total quality of life score.<sup>16</sup>

General Self-Efficacy Scale (GSE): A 10-item questionnaire on self-efficacy, i.e., the belief to succeed in a given situation or task, e.g., “I can always manage to solve difficult problems if I try hard enough” (Item 1). It is scored on a four-point Likert-scale, “Not at all true” (1) to “Exactly true” (4).<sup>17</sup>

Generalized Anxiety Disorder – 7 Items (GAD-7): A seven-item questionnaire on symptoms of anxiety and worry, e.g., “How often have they been bothered by the following over the past 2 weeks? Feeling nervous, anxious, or on the edge” (Item 1). It is scored on a four-point Likert-scale, “Not at all” (0) to “Nearly every day” (3).<sup>18</sup>

Patient Health Questionnaire – 9 Items (PHQ-9): A nine-item questionnaire on symptoms of depression and mood, e.g., “How often have they been bothered by the following over the

1  
2  
3 past 2 weeks? Little interest or pleasure in doing things?" (Item 1). It is scored on a four-point  
4 Likert-scale, "Not at all" (0) to "Nearly every day" (3).<sup>19</sup>  
5

6  
7 Visual Analogue Scales (VAS): Four items assessing different aspects of the patients' care  
8 needs and current health status are administered monthly via SMS. These include the  
9 following; 1) "I feel confident about receiving care when I need it" 2) "I am able to actively  
10 participate in my care", and 3) "I believe care is available when needed". These are scored on  
11 a continuum ranging from "I do not agree at all" (0) to "Totally agree" (10). Also, a fourth  
12 item concerns "How would you rate your current health status?", which is rated between  
13 "Worst possible health" (0) and "Best possible health" (10).  
14

15  
16 For adolescents and their caregivers, a separate set of self-reported outcomes will be used.  
17

18  
19 KIDSCREEN: An 11-item questionnaire on aspects related to health-related quality of life,  
20 e.g., "Thinking about the last week: have you been able to do the things that you want to do  
21 in your free time?" (Item 1). It is scored on a five-point Likert-scale, "Not at all" or "Never"  
22 (0) to "Extreme" or "Always" (4). One item is supposed to reflect the participant's overall  
23 health status, i.e., "In general, how would you say your health is?". KIDSCREEN is  
24 administered to both the patients and their caregivers.<sup>20</sup>  
25

26  
27 Alcohol, Smoking and Substance Involvement Screening Test (ASSIST-Y): A seven-item  
28 questionnaire on alcohol, substance, and tobacco use among adolescents. It screens for the  
29 consumption and negative effects of different compounds, similar to AUDIT and DUDIT,  
30 weighting scores differently depending on frequency and impact of their use.<sup>21</sup>  
31

32  
33 Children's Global Assessment Scale (C-GAS): A clinician-rating scale that asks healthcare  
34 providers to rate the health status of a patient. It is scored on a continuum ranging from  
35 "Needs constant supervision" (1-10) to "Superior functioning" (100).<sup>22</sup>  
36

37  
38 The Strengths and Difficulties Questionnaire (SDQ): A 25-item questionnaire on the  
39 psychological well-being of an adolescent, e.g., "Often loses temper" (Item 5). It is scored on  
40 a three-point Likert-scale, "Not true" (0) to "Certainly true" (2). SDQ is administered to both  
41 the patients and their caregivers.<sup>23</sup>  
42

43  
44 Revised Children's Anxiety and Depression Scale (RCADS): A 47-item questionnaire  
45 covering different symptoms of different psychiatric conditions, e.g., "I worry that something  
46 bad will happen to me" (Item 27). It is scored on a four-point Likert-scale, "Never" (0) to  
47 "Always" (3). RCADS is administered to both the patients and their caregivers.<sup>24</sup>  
48

49  
50 A separate study will also investigate how the use of PCA among adolescents affect their  
51 caregivers' quality of life (BBQ), functioning (Burden Assessment Scale),<sup>25</sup> and the  
52 perceived reception by healthcare providers (Family Involvement and Alienation  
53 Questionnaire).<sup>26</sup>  
54

### 55 **Sample size calculation**

56  
57 The present study intends to examine the impact of introducing PCA in psychiatric care in  
58 Region Stockholm. As such, only patients who are assigned PCA and have consented to take  
59 part in the research are included. An a priori sample size calculation, which is typically used  
60 to estimate an adequate sample size for subsequent recruitment, is thus not informative.  
However, based on previous experiences of introducing PCA in the region, it is reasonable to

1  
2  
3 expect about twelve patients per inpatient ward who consent to participate, which would  
4 amount to a total sample size of 564.<sup>7</sup> When calculating the standardized effect size possible  
5 to detect under these circumstances, based on the difference between two dependent means,  
6 and using a probability level of .05 and a power of 0.80, the result is Cohen's *d* of 0.12,  
7 which is a small, albeit clinically relevant effect for a population of patients with severe  
8 psychiatric disorders, and in line with similar findings on self-reported outcomes.<sup>4 8 9</sup>  
9  
10

### 11 ***Statistical analysis***

12 Previous studies on the use of PCA have demonstrated that hospitalization rates are seldom  
13 normally distributed. In essence, few patients will use the possibility to admit themselves to  
14 inpatient care, resulting in data that is positively skewed and has a leptokurtic distribution.  
15 Investigating whether assumptions of normality are violated will therefore be essential prior  
16 to any statistical analysis, whereby suitable means of analyzing the data will be employed,  
17 that is, non-parametric tests or bootstrapping procedures. As for the self-reported outcomes,  
18 no prior evidence seems to suggest that data will not be normally distributed. Here,  
19 conditional changes over time will instead be modeled using a mixed models-approach, i.e.,  
20 multilevel models. All analyses will be made according to an intent-to-treat principle,  
21 accounting for those values that have been lost via multiple imputation or maximum  
22 likelihood estimation. Likewise, all analyses will control for potential confounders, such as  
23 hospitalization rates prior to PCA and self-reported outcomes when assigned PCA, as well as  
24 demographics available in the hospital records, e.g., age, gender, civil status, children, and  
25 psychiatric disorders.  
26  
27  
28  
29

30 Apart from studying the results of introducing PCA, the present study will also assess its  
31 cost-effectiveness, similar to a newly published study from Denmark.<sup>10</sup> This includes  
32 determining the direct and total healthcare costs prior to and after being assigned PCA. Direct  
33 costs are the expenditures associated with each visit to a psychiatric emergency department,  
34 inpatient care, and involuntary care. Such expenditures are calculated from standardized price  
35 estimates provided by Region Stockholm, resulting in an approximation of how expenditures  
36 change following the implementation of PCA. Total healthcare costs are the expenditures of  
37 other types of healthcare, e.g., visits to primary care. Moreover, cost-utility analyses will also  
38 entail so-called Quality Adjusted Life Years (QALYs), which represent the improvement in  
39 terms of well-being for each incremental increase in costs by allowing patients to admit  
40 themselves, i.e., a cost-utility approach. QALYs can be derived from self-reported outcomes  
41 on the EQ-5D-5L, which is commonly used for this purpose, using population-generated  
42 preference weights which are available for a Swedish setting.<sup>27</sup> This will be compared to  
43 matched patients using registries. In addition, probability sensitivity analyses will be  
44 conducted to determine the errors that surrounds the cost-utility calculations made. This  
45 provides confidence ellipses at 50%, 75% and 95% that represent the uncertainty associated  
46 with each estimate.  
47  
48  
49

### 50 ***Qualitative studies***

51 In addition to the quantitative studies, the present study will also involve a number of  
52 qualitative investigations to further the current understanding of its use and effects, similar to  
53 previous research in the field<sup>28 29</sup>. First, patients who have been assigned PCA for at least 12  
54 months will be recruited to share their perspective ( $n = 30$ ). Recruitment will be purposeful to  
55 ensure heterogeneity with regard to patient groups and the extent to which PCA have been  
56 used. The aim is to explore how PCA has been perceived and what impact it might have had  
57 on both day-to-day activities and quality of life. Second, healthcare providers from different  
58 inpatient wards and professional backgrounds, having had at least 12 months of experience of  
59  
60

1  
2  
3 working with PCA, will be recruited to provide their view of its application ( $n = 30$ ). The aim  
4 is to investigate their attitudes toward the method in general, the implementation of PCA in  
5 particular, and whether these have changed over time as a result of working with PCA. Third,  
6 caregivers of adolescents who have been assigned PCA for at least 12 months will be  
7 recruited to share their experiences ( $n = 20$ ), both in terms of how they have perceived its  
8 effects for the adolescent and how it might have affected their own situation. All of the  
9 qualitative studies will be made using individual semi-structured interviews that are recorded  
10 digitally and transcribed ad verbum. Given the exploratory nature of this research, all  
11 analyses will be inductive and done in accordance with thematic analysis.<sup>30</sup> This approach is  
12 often used in social sciences as well as in health sciences and helps to understand the  
13 viewpoint of an individual in relation to a specific topic, phenomenon, or subject matter. This  
14 can be particularly useful in examining patterns and concepts in shared responses, which is  
15 helpful in generating hypotheses in a research field that lacks prior research.  
16  
17  
18

### 19 **Ethics and dissemination**

20 The present study was approved in March 2021 by the Swedish Ethical Review Authority  
21 (Dnr: 2020-06498), and has been registered as a clinical trial on [www.ClinicalTrials.gov](http://www.ClinicalTrials.gov)  
22 (NCT04862897). All data is recorded using Region Stockholm's public healthcare's digital  
23 medical records system, TakeCare, and only exported for statistical analyses in an aggregated  
24 pseudonymized format. Moreover, participant identifiers instead of Swedish social security  
25 numbers are used to ensure anonymity, e.g., LSR64UFL. To participate in the research,  
26 informed consent has to be provided, and for adolescents, this includes caregivers (e.g., legal  
27 parents, custodians, or other entities responsible for the patient's care).  
28  
29

30 Given the novelty of the intervention and lack of research concerning PCA, the present study  
31 has the potential to make a significant contribution to the field. Apart from examining its  
32 effects with regard to hospitalization rates, self-reported outcomes will help to investigate  
33 possible benefits on symptoms, quality of life, and autonomy. In addition, qualitative studies  
34 will provide useful insights regarding its use and implications for care and everyday life,  
35 including the opinions of caregivers of adolescents. In order to successfully disseminate the  
36 results, findings will be presented in international peer-reviewed journals, at scientific  
37 conferences, and as part of two doctoral theses. In addition, an ongoing collaboration with  
38 patient representatives will ensure Patient Public Involvement and dissemination to patients  
39 and their significant others, primarily through the Swedish Partnership for Mental Health  
40 (NSPH).  
41  
42  
43

### 44 **Author's contributions**

45 AR, SS, TL, NJL, MSL, EA, AB, CH, MS and LF have all been involved in the design and  
46 planning of the present study. All authors have taken part in drafting the manuscript and are  
47 also part of the steering group for researching PCA in the region.  
48  
49

### 50 **Funding statement**

51 The present study, its implementation, and research is funded by the Commissioner of  
52 Healthcare in Region Stockholm and Vetenskapsrådet (2021-06378).  
53  
54

### 55 **Competing interest statement**

56 None declared.  
57

### 58 **References**



1. Strand M, von Hausswolff-Juhlin Y. Patient-controlled hospital admission in psychiatry: A systematic review. *Nord J Psychiatry* 2015;69(8):574-86. doi: 10.3109/08039488.2015.1025835 [published Online First: 2015/04/03]
2. Pelto-Piri V, Engström K, Engström I. Paternalism, autonomy and reciprocity: ethical perspectives in encounters with patients in psychiatric in-patient care. *BMC medical ethics* 2013;14(1):1-8.
3. Koekkoek B, van der Snoek R, Oosterwijk K, et al. Preventive psychiatric admission for patients with borderline personality disorder: a pilot study. *Perspect Psychiatr Care* 2010;46(2):127-34. doi: 10.1111/j.1744-6163.2010.00248.x [published Online First: 2010/04/10]
4. Moljord IEO, Lara-Cabrera ML, Salvesen O, et al. Twelve months effect of self-referral to inpatient treatment on patient activation, recovery, symptoms and functioning: A randomized controlled study. *Patient Educ Couns* 2017;100(6):1144-52. doi: 10.1016/j.pec.2017.01.008 [published Online First: 2017/01/18]
5. Moljord IE, Helland-Hansen KA, Salvesen O, et al. Short time effect of a self-referral to inpatient treatment for patients with severe mental disorders: a randomized controlled trial. *BMC Health Serv Res* 2016;16(1):513. doi: 10.1186/s12913-016-1712-z [published Online First: 2016/09/24]
6. Thomsen CT, Benros ME, Maltesen T, et al. Patient-controlled hospital admission for patients with severe mental disorders: a nationwide prospective multicentre study. *Acta Psychiatr Scand* 2018;137(4):355-63. doi: 10.1111/acps.12868 [published Online First: 2018/03/06]
7. Skott M, Durbeej N, Smitmanis-Lyle M, et al. Patient-controlled admissions to inpatient care: A twelve-month naturalistic study of patients with schizophrenia spectrum diagnoses and the effects on admissions to and days in inpatient care. *BMC Health Serv Res* 2021;21(1):598. doi: 10.1186/s12913-021-06617-8 [published Online First: 2021/06/25]
8. Westling S, Daukantaite D, Liljedahl SI, et al. Effect of Brief Admission to Hospital by Self-referral for Individuals Who Self-harm and Are at Risk of Suicide: A Randomized Clinical Trial. *JAMA Netw Open* 2019;2(6):e195463. doi: 10.1001/jamanetworkopen.2019.5463 [published Online First: 2019/06/08]
9. Strand M, Bulik CM, Gustafsson SA, et al. Self-admission to inpatient treatment in anorexia nervosa: Impact on healthcare utilization, eating disorder morbidity, and quality of life. *Int J Eat Disord* 2020 doi: 10.1002/eat.23346 [published Online First: 2020/07/16]
10. Paaske LS, Sopina L, Olsen KR, et al. The impact of patient-controlled hospital admissions among patients with severe mental disorders on health care cost: A nationwide register-based cohort study using quasi-experimental design. *J Psychiatr Res* 2021;144:331-37. doi: 10.1016/j.jpsychires.2021.10.032 [published Online First: 2021/11/06]
11. Olso TM, Gudde CB, Moljord IE, et al. More than just a bed: mental health service users' experiences of self-referral admission. *Int J Ment Health Syst* 2016;10:11. doi: 10.1186/s13033-016-0045-y [published Online First: 2016/02/27]
12. Eckerström J, Flyckt L, Carlborg A, et al. Brief admission for patients with emotional instability and self-harm: A qualitative analysis of patients' experiences during crisis. *International Journal of Mental Health Nursing* 2020 doi: 10.1111/inm.12736
13. Herdman M, Gudex C, Lloyd A, et al. Development and preliminary testing of the new five-level version of EQ-5D (EQ-5D-5L). *Quality of life research* 2011;20(10):1727-36.

14. Üstün TB, Kostanjsek N, Chatterji S, et al. Measuring health and disability: Manual for WHO disability assessment schedule WHODAS 2.0: World Health Organization 2010.
15. Busner J, Targum SD. The Clinical Global Impressions Scale: Applying a research tool in clinical practice. *Psychiatry (Edgmont)* 2007;4(7):28-37.
16. Lindner P, Frykheden O, Forsstrom D, et al. The Brunnsviken Brief Quality of Life Scale (BBQ): Development and Psychometric Evaluation. *Cogn Behav Ther* 2016;45(3):182-95. doi: 10.1080/16506073.2016.1143526 [published Online First: 2016/02/18]
17. Sherer M, Maddux JE, Mercandante B, et al. The self-efficacy scale: Construction and validation. *Psychological reports* 1982;51(2):663-71.
18. Spitzer RL, Kroenke K, Williams JB, et al. A brief measure for assessing generalized anxiety disorder: the GAD-7. *Archives of internal medicine* 2006;166(10):1092-97.
19. Kroenke K, Spitzer RL, Williams JB. The PHQ-9: validity of a brief depression severity measure. *Journal of general internal medicine* 2001;16(9):606-13.
20. Ravens-Sieberer U, Gosch A, Rajmil L, et al. KIDSCREEN-52 quality-of-life measure for children and adolescents. *Expert review of pharmacoeconomics & outcomes research* 2005;5(3):353-64.
21. Humeniuk R, Holmwood C, Beshara M, et al. ASSIST-Y V1. 0: First-Stage Development of the WHO Alcohol, Smoking and Substance Involvement Screening Test (ASSIST) and linked brief intervention for young people. *Journal of Child & Adolescent Substance Abuse* 2016;25(4):384-90.
22. Shaffer D, Gould MS, Brasic J, et al. A children's global assessment scale (CGAS). *Archives of General psychiatry* 1983;40(11):1228-31.
23. Goodman R. The Strengths and Difficulties Questionnaire: a research note. *Journal of child psychology and psychiatry* 1997;38(5):581-86.
24. Chorpita BF, Yim L, Moffitt C, et al. Assessment of symptoms of DSM-IV anxiety and depression in children: A revised child anxiety and depression scale. *Behaviour research and therapy* 2000;38(8):835-55.
25. Ewertzon M, Lützen K, Svensson E, et al. Developing the concept of family involvement and the alienation questionnaire in the context of psychiatric care. *International Journal of Mental Health Nursing* 2008;17(6):439-49.
26. Reinhard SC, Gubman GD, Horwitz AV, et al. Burden assessment scale for families of the seriously mentally ill. *Evaluation and program planning* 1994;17(3):261-69.
27. Burström K, Sun S, Gerdtham U-G, et al. Swedish experience-based value sets for EQ-5D health states. *Quality of Life Research* 2014;23(2):431-42.
28. Ellegaard T, Bliksted V, Lomborg K, et al. Use of patient-controlled psychiatric hospital admissions: patients' perspective. *Nord J Psychiatry* 2017;71(5):370-77. doi: 10.1080/08039488.2017.1302505 [published Online First: 2017/03/23]
29. Ellegaard T, Mehlsen M, Lomborg K, et al. Use of patient-controlled psychiatric hospital admissions: mental health professionals' perspective. *Nord J Psychiatry* 2017;71(5):362-69. doi: 10.1080/08039488.2017.1301548 [published Online First: 2017/03/21]
30. Braun V, Clarke V. Using thematic analysis in psychology. *Qualitative Research in Psychology* 2006;3(2):77-101. doi: 10.1191/1478088706qp063oa
